# Supplementary material for: Ascl1 promotes tangential migration and confines migratory routes by induction of Ephb2 in the telencephalon
Source: PubMed Central journal article supplement (PMC5343589; doi:10.1038/srep42895), 2017-03-09
Supplement: srep42895-s1.pdf [file srep42895-s1.pdf]

## Ascl1 promotes tangential migration and confines migratory routes by induction of Ephb2 in the telencephalon

Yuan-Hsuan Liu, Jin-Wu Tsai, Jia-Long Chen, Wan-Shan Yang, Pei-Ching Chang, Pei-Lin Cheng, David L. Turner, Yuchio Yanagawa, Tsu-Wei Wang, Jenn-Yah Yu

### Supplementary information

**Table S1. The primer sequences used for quantitative RT-PCR**

| Gene         | Forward primer (5'->3') | Reverse primer (5'->3')   |
|--------------|-------------------------|---------------------------|
| <i>Epha3</i> | TGGCTCCTTGGACAGTTTCT    | TTCCCACAAGCTGGATGACT      |
| <i>Epha4</i> | AGGTGTCTGACTTTGGCATGT   | CAGTCCACCGGATAGGAATC      |
| <i>Epha5</i> | TTGCGAAGGAGATTGAAGC     | GCAAACCTCACCAAATTCACC     |
| <i>Ephb1</i> | CAAGACTGTGGCAACCATCA    | AGTCTGGGATAGAGCGGTCA      |
| <i>Ephb2</i> | TAGACATGCCTTGCACAACC    | GTCTCGTTGACGCTGGAGAT      |
| <i>Efna5</i> | GCCAGGCCGAGAGTATTC      | CAGGACCTTCTTCCGTTGTC      |
| <i>Efnb1</i> | AGTGGCTTGTGGCTATGGTC    | GGGTTAAGAGAGCTCCAGGAC     |
| <i>Efnb2</i> | GGTCAAGGCTGCTTGCTG      | GCATTATCTATTTCCCTTCCTGCAT |
| <i>Efnb3</i> | TGGAACTCGGCGAATAAGAG    | CCCCGATCTGAGGATAAAGC      |
| <i>Dlx2</i>  | GCCTCACCCAAACTCAGGT     | AGGCACAAGGAGGAGAAGC       |
| <i>Tbp</i>   | CGGTTCGCGTCATTTTCTC     | GGGTTATCTTCACACACCATGA    |

**Table S2. Target sequences for *Dlx2*, *Ephb1*, and *Ephb2* of shRNA expression constructs**

| <b>shRNA expression construct</b> | <b>Target sequence (5'-&gt;3')</b> |
|-----------------------------------|------------------------------------|
| shDlx2#1                          | CTTGAGCCTGAAATCCGAATA              |
| shDlx2#2                          | CCGATCCAAGTTCAAGAAGAT              |
| shEphB1#1                         | CCATCGCCTACCGCAAGTTTA              |
| shEphB1#2                         | CCGGCCTGTCATGATCATTAC              |
| shEphB2#1                         | CCTTAGACATGCCTTGCACAA              |
| shEphB2#2                         | CAAGACGTAATCAACGCCATT              |

**Table S3. The primer sequences used for PCR after ChIP**

| <b>Promotor/Enhancer</b> | <b>Forward primer (5'-&gt;3')</b> | <b>Reverse primer (5'-&gt;3')</b> |
|--------------------------|-----------------------------------|-----------------------------------|
| <i>Dll1</i>              | GCGTGGCTGTCATTAAGG                | GGTGCTGTCTGCATTACC                |
|                          |                                   |                                   |
| <i>Ephb1</i> (B1R1)      | AGCAGGGTTCTTTTTGGATG              | TTTTGCTGTCCCTCTGATCC              |
| <i>Ephb1</i> (B1R2)      | CGGGGTACAGAGGACAGAA               | CAAGCACACCCAGCAAAAC               |
| <i>Ephb1</i> (B1R3)      | CAGGGTGGGGAATCAATGTA              | GTCAGAAGCTGTGTGGCAGA              |
| <i>Ephb1</i> (B1R4)      | GCCCTACAGTGGATGCTCAG              | GCATGCATCTGTGGAGTGAG              |
| <i>Ephb1</i> (B1NE)      | CCATCCATCCATCCATCAGT              | TTCATCCCTCCAGCCTCTAA              |
|                          |                                   |                                   |
| <i>Ephb2</i> (B2R1)      | GGTCTGGATCCAAAGCTCAC              | GAAAGATGATCACGGGTTCC              |
| <i>Ephb2</i> (B2R2)      | AAGGGATGAGTGTGGGTGTC              | GGCTGTTACGTTTCCAGAT               |
| <i>Ephb2</i> (B2R3)      | CCCCAGGGGATAGAAAGAAA              | CAGACAAACCAAGGGGCTTA              |
| <i>Ephb2</i> (B2R4)      | TTCTGTTCTGCCTCCTTTGC              | CAAGGCCCATCAGACAGACT              |
| <i>Ephb2</i> (B2R5)      | CATCCGAAGGGACTCAAAAG              | CAGCAGAATGAGCCATCCA               |
| <i>Ephb2</i> (B2NE)      | AAATGGAACAAGGGGTTGTG              | CCGCACATTGTATTTCTCCTC             |

**Table S4. Minimum Information for Publication of qPCR Experiments**

| Item to Check                                        | Importance | Checklist | Description                                                                                                                                                                                                                |
|------------------------------------------------------|------------|-----------|----------------------------------------------------------------------------------------------------------------------------------------------------------------------------------------------------------------------------|
| <b>Experimental design</b>                           |            |           |                                                                                                                                                                                                                            |
| Definition of experimental and control groups        | E          | Yes       | Control:US2<br>Experimental group: Neurog2, Ascl1, and Dlx2                                                                                                                                                                |
| Number within each group                             | E          | Yes       | N=4                                                                                                                                                                                                                        |
| Assay carried out by core lab or investigator's lab? | D          | Yes       | investigator's lab                                                                                                                                                                                                         |
| <b>Sample</b>                                        |            |           |                                                                                                                                                                                                                            |
| Description                                          |            |           | P19 cell line                                                                                                                                                                                                              |
| Volume/mass of sample processed                      | D          | Yes       | 5X10 <sup>6</sup> cells/well                                                                                                                                                                                               |
| Microdissection or macrodissection                   | E          | Yes       | Cells were lysed by lysis buffer with 1% <i>2-mercaptoethanol</i>                                                                                                                                                          |
| Processing procedure                                 | E          | Yes       |                                                                                                                                                                                                                            |
| If frozen - how and how quickly?                     | E          | N/A       |                                                                                                                                                                                                                            |
| If fixed - with what, how quickly?                   | E          | N/A       |                                                                                                                                                                                                                            |
| Sample storage conditions and duration               | E          | Yes       | Samples stored at -80°C and proceed to analyzed within one week.                                                                                                                                                           |
| <b>Nucleic Acid Extraction</b>                       |            |           |                                                                                                                                                                                                                            |
| Procedure and/or instrumentation                     | E          | Yes       | All procedures were followed the guidance of QIAGEN's RNeasy Mini Kit (Catalog; 74014).                                                                                                                                    |
| Name of kit and details of any modifications         | E          | Yes       |                                                                                                                                                                                                                            |
| Source of additional reagents used                   | D          | Yes       | Add 4μL RQ1 Dnase (10U/μL, Promega) into reaction solution at 37°C for 30 mins.                                                                                                                                            |
| Details of DNase or RNase treatment                  | E          | Yes       |                                                                                                                                                                                                                            |
| Nucleic acid quantification                          | E          | Yes       | We used Nanodrop ND-1000 to quantify our extracted RNA. All quantification methods were followed the user's manual. The extracted products with the ratio of A260/A80 around 2.0 were preceding the following experiments. |
| Instrument and method                                | E          | Yes       |                                                                                                                                                                                                                            |
| Purity (A260/A280)                                   | D          | Yes       |                                                                                                                                                                                                                            |
| Yield                                                | D          | Yes       |                                                                                                                                                                                                                            |
| RNA integrity method/instrument                      | E          | Yes       | We used electrophoresis to check the integrity of extracted RNA.                                                                                                                                                           |
| RIN/RQI or Cq of 3' and 5' transcripts               | E          | No        |                                                                                                                                                                                                                            |
| Electrophoresis traces                               | D          | Yes       |                                                                                                                                                                                                                            |
| Inhibition testing (Cq dilutions, spike or other)    | E          | No        |                                                                                                                                                                                                                            |
| <b>Reverse Transcription</b>                         |            |           |                                                                                                                                                                                                                            |
| Complete reaction conditions                         | E          | Yes       |                                                                                                                                                                                                                            |
| Component                                            |            |           |                                                                                                                                                                                                                            |
| Total RNA                                            |            |           | 2 μg                                                                                                                                                                                                                       |
| Oligo(dT) <sub>12-18</sub> primer, 0.5μg/μL          |            |           | 1 μL                                                                                                                                                                                                                       |
| 25mM dNTP                                            |            |           | 0.4 μL                                                                                                                                                                                                                     |
| 100mM DTT                                            |            |           | 1 μL                                                                                                                                                                                                                       |
| 5X First-strand buffer                               |            |           | 4 μL                                                                                                                                                                                                                       |

|                                                                                                                                               |   |     |                                                                                                                                                                                                   |
|-----------------------------------------------------------------------------------------------------------------------------------------------|---|-----|---------------------------------------------------------------------------------------------------------------------------------------------------------------------------------------------------|
| (250 mM Tris-HCl (pH 8.3), 375 mM KCl, 15 mM MgCl <sub>2</sub> )<br>RNasin <sup>®</sup> Ribonuclease Inhibitor, 40U/μL<br>Nuclease-free water |   |     | 1 μL<br>Up to 20 μL                                                                                                                                                                               |
| Amount of RNA and reaction volume                                                                                                             | E | Yes | 2 μg                                                                                                                                                                                              |
| Priming oligonucleotide and concentration                                                                                                     | E | Yes | Oligo(dT) <sub>12-18</sub> (Invitrogen), 0.5 μg/μL                                                                                                                                                |
| Reverse transcriptase and concentration                                                                                                       | E | Yes | Superscript <sup>®</sup> III Reverse transcriptase (Invitrogen), 200U/μL                                                                                                                          |
| Temperature and time                                                                                                                          | E | Yes | cDNA was synthesized at 50°C for 120 minutes. We inactivate the reaction by heating at 70°C for 15 minutes.                                                                                       |
| Manufacturer of reagents and catalogue numbers                                                                                                | D | Yes | RNasin <sup>®</sup> (Promega): N2111                                                                                                                                                              |
| Cqs with and without RT                                                                                                                       | D | No  |                                                                                                                                                                                                   |
| Storage conditions of cDNA                                                                                                                    | D | Yes | Storage the cDNA at -20°C                                                                                                                                                                         |
| <b>qPCR Target Information</b>                                                                                                                |   |     |                                                                                                                                                                                                   |
| If multiplex, efficiency and LOD of each assay                                                                                                | E | N/A |                                                                                                                                                                                                   |
| Sequence accession number                                                                                                                     | E | Yes | EphA3: NM_010140<br>EphA4: NM_007936<br>EphA5: NM_007937<br>EphB1: NM_001168296<br>EphB2: NM_001290753<br>Ephrin-B1: NM_010110<br>Ephrin-B2: NM_010111<br>Ephrin-B3: NM_007911<br>Dlx2: NM_010054 |
| Location of amplicon                                                                                                                          | D | N/A |                                                                                                                                                                                                   |
| Amplicon length                                                                                                                               | E | Yes | 130-150 b.p.                                                                                                                                                                                      |
| In silico specificity screen (BLAST, etc)                                                                                                     | E | Yes | BLAST                                                                                                                                                                                             |
| Pseudogenes, retropseudogenes or other homologs?                                                                                              | D | Yes | Non-detected in the BLAST                                                                                                                                                                         |
| Sequence alignment                                                                                                                            | D | Yes | Alignment has been checked during the specificity screen in the BLAST.                                                                                                                            |
| Secondary structure analysis of amplicon                                                                                                      | D | No  |                                                                                                                                                                                                   |
| Location of each primer by exon or intron (if applicable)                                                                                     | E | Yes |                                                                                                                                                                                                   |
| What splice variants are targeted?                                                                                                            | E | N/A |                                                                                                                                                                                                   |
| <b>qPCR Oligonucleotides</b>                                                                                                                  |   |     |                                                                                                                                                                                                   |
| Primer sequences                                                                                                                              | E | Yes | See sup. Table S1 and S2                                                                                                                                                                          |
| RTPrimerDB Identification Number                                                                                                              | D | N/A |                                                                                                                                                                                                   |
| Probe sequences                                                                                                                               | D | N/A |                                                                                                                                                                                                   |
|                                                                                                                                               |   |     |                                                                                                                                                                                                   |
| Location and identity of any modifications                                                                                                    | E | N/A |                                                                                                                                                                                                   |
| Manufacturer of oligonucleotides                                                                                                              | D | Yes | Mission Biotech                                                                                                                                                                                   |

|                                                           |   |     |                                                           |
|-----------------------------------------------------------|---|-----|-----------------------------------------------------------|
| Purification method                                       | D | Yes | HPLC                                                      |
| qPCR PROTOCOL                                             |   |     |                                                           |
| Complete reaction conditions                              | E | Yes |                                                           |
| Component                                                 |   |     | Amount                                                    |
| 2X SYBR Green Master mix (Roche)                          |   |     | 6 µL                                                      |
| 20 µM Forward primer                                      |   |     | 0.6 µL                                                    |
| 20 µM Reverse primer                                      |   |     | 0.6 µL                                                    |
| cDNA (1:10 diluted from stock cDNA)                       |   |     | 2 µL                                                      |
| Nuclease-free water                                       |   |     | 2.8 µL                                                    |
| total                                                     |   |     | 12 µL                                                     |
| Reaction volume and amount of cDNA/DNA                    | E | Yes | 1:10 diluted from stock cDNA, used 2 µL/tube              |
| Primer, (probe), Mg <sup>++</sup> and dNTP concentrations | E | Yes |                                                           |
| Polymerase identity and concentration                     | E | Yes | 2X SYBR Green Master mix (04913850001, Roche)             |
| Buffer/kit identity and manufacturer                      | E | Yes | 2X SYBR Green Master mix (Roche)                          |
| Exact chemical constitution of the buffer                 | D | NO  | Manufactures proprietary                                  |
| Additives (SYBR Green I, DMSO, etc.)                      | E | N/A |                                                           |
| Manufacturer of plates/tubes and catalog number           | D | Yes | Gunster, catalog: MB-q100                                 |
| Complete thermocycling parameters                         | E | Yes | 95°C 15 for 15 sec, then 60°C for 1 min. Total 40 cycles. |
|                                                           |   |     |                                                           |
| Reaction setup (manual/robotic)                           | D | Yes | Manual setup                                              |
| Manufacturer of qPCR instrument                           | E | Yes | StepOnePlus™ Real-Time PCR System (Applied Biosystems)    |
| <b>qPCR Validation</b>                                    |   |     |                                                           |
| Evidence of optimization (from gradients)                 | D | No  |                                                           |
| Specificity (gel, sequence, melt, or digest)              | E | Yes | Melt curve.<br>See Supplementary spreadsheet I            |
| For SYBR Green I, Cq of the NTC                           | E | Yes | NTC was undetected in each experiment.                    |
| Standard curves with slope and y-intercept                | E | Yes | See Supplementary spreadsheet I                           |
| PCR efficiency calculated from slope                      | E | Yes | See Supplementary spreadsheet I                           |
| Confidence interval for PCR efficiency or standard error  | D | N/A |                                                           |
| r <sup>2</sup> of standard curve                          | E | Yes | See Supplementary spreadsheet I                           |
| Linear dynamic range                                      | E | N/A |                                                           |
| Cq variation at lower limit                               | E | N/A |                                                           |
| Confidence intervals throughout range                     | D | N/A |                                                           |
| Evidence for limit of detection                           | E | N/A |                                                           |
| If multiplex, efficiency                                  | E | N/A |                                                           |

|                                                       |   |     |                                                                                                                                  |
|-------------------------------------------------------|---|-----|----------------------------------------------------------------------------------------------------------------------------------|
| and LOD of each assay                                 |   |     |                                                                                                                                  |
| <b>Data Analysis</b>                                  |   |     |                                                                                                                                  |
| qPCR analysis program (source, version)               | E | Yes | <b>All data were processing by StepOnePlus™ V2.3</b> software (Applied Biosystems).                                              |
| Cq method determination                               | E | Yes |                                                                                                                                  |
| Outlier identification and disposition                | E | Yes |                                                                                                                                  |
| Results of NTCs                                       | E | Yes | NTC was undetected in each experiment.                                                                                           |
| Justification of number and choice of reference genes | E | Yes | TATA binding protein (TBP) was selected as the reference gene. We normalized target's Cq to reference's Cq to get delt-Cq.       |
| Description of normalization method                   | E | Yes |                                                                                                                                  |
| Number and concordance of biological replicates       | E | Yes | N=4                                                                                                                              |
| Number and stage (RT or qPCR) of technical replicates | E | Yes | N=3                                                                                                                              |
| Repeatability (intra-assay variation)                 | E | Yes | We use SPSS V.16 (IBM) to analyze our results. The Statistical significance was checked by ANOVA with Tukey's-HSD post hoc test. |
| Reproducibility (inter-assay variation, %CV)          | D | No  |                                                                                                                                  |
| Power analysis                                        | D | No  |                                                                                                                                  |
| Statistical methods for result significance           | E | Yes |                                                                                                                                  |
| Software (source, version)                            | E | Yes |                                                                                                                                  |
| Cq or raw data submission using RDML                  | D | N/A | The raw Cq was listed in the Supplementary spreadsheet I.                                                                        |

E: Essential information, D: Desirable information, N/A: Not applicable

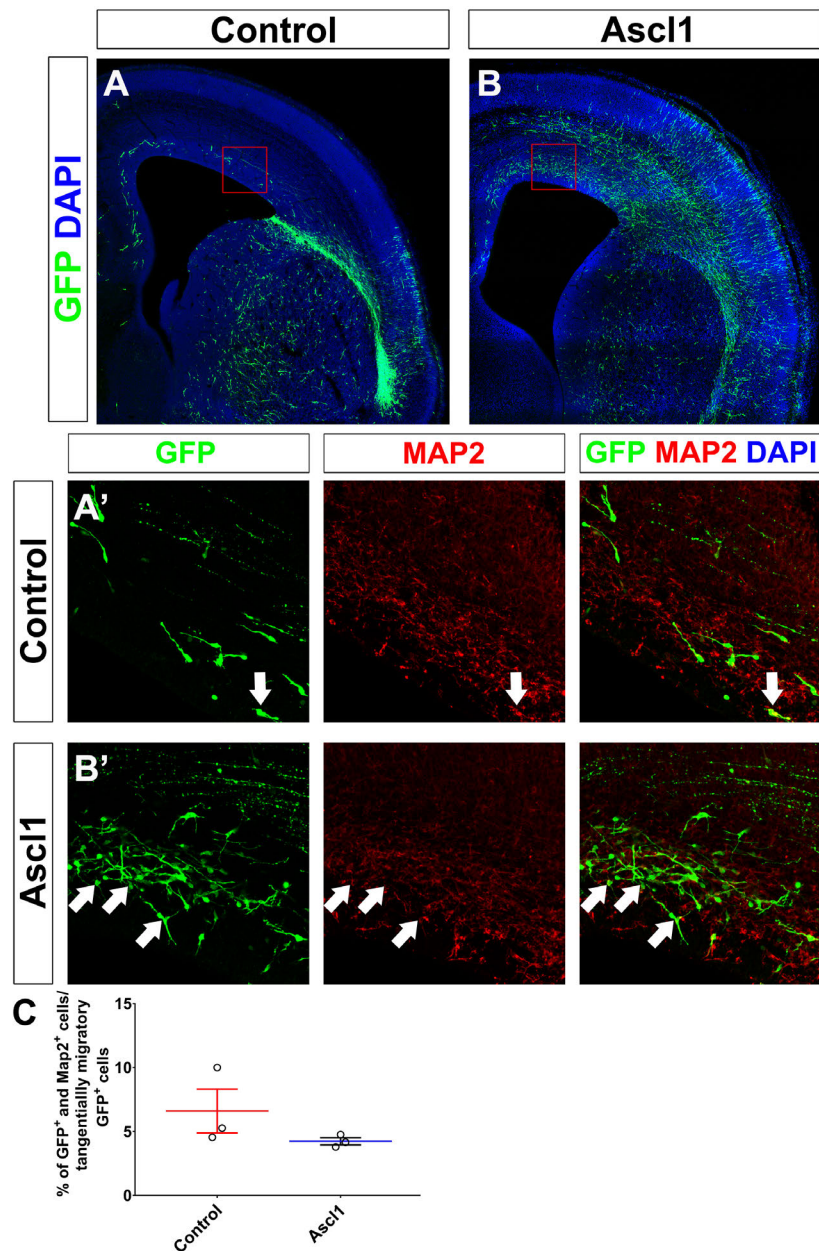

**Figure S1. Overexpression of *Ascl1* in the ventral telencephalon does not promote premature neuronal differentiation.** Four days after electroporation, brains of E19.5 rats were dissected and sectioned in the coronal plane. Electroporated cells were labeled with anti-GFP in green. Differentiating and differentiated neurons were labeled with anti-MAP2 in red. Nuclear DNA was stained with DAPI in blue. (A-B) Confocal images; a red square indicates the zoomed area for (A', B'). (A', B') In both the control and *Ascl1* groups, some GFP-positive cells were distributed in the VZ/SVZ of the dorsal telencephalon. A few GFP-positive cells were positive for MAP2 (indicated by white arrows). Length of the scale bar is 120  $\mu\text{m}$  in (A-B), and 50  $\mu\text{m}$  in (A'-B'). (C) Quantification of GFP and MAP2 double-positive cells over total GFP-positive cells in the dorsal telencephalon. Data were presented as mean $\pm$ SEM with all data points and analyzed by Student's t-test, n=3.



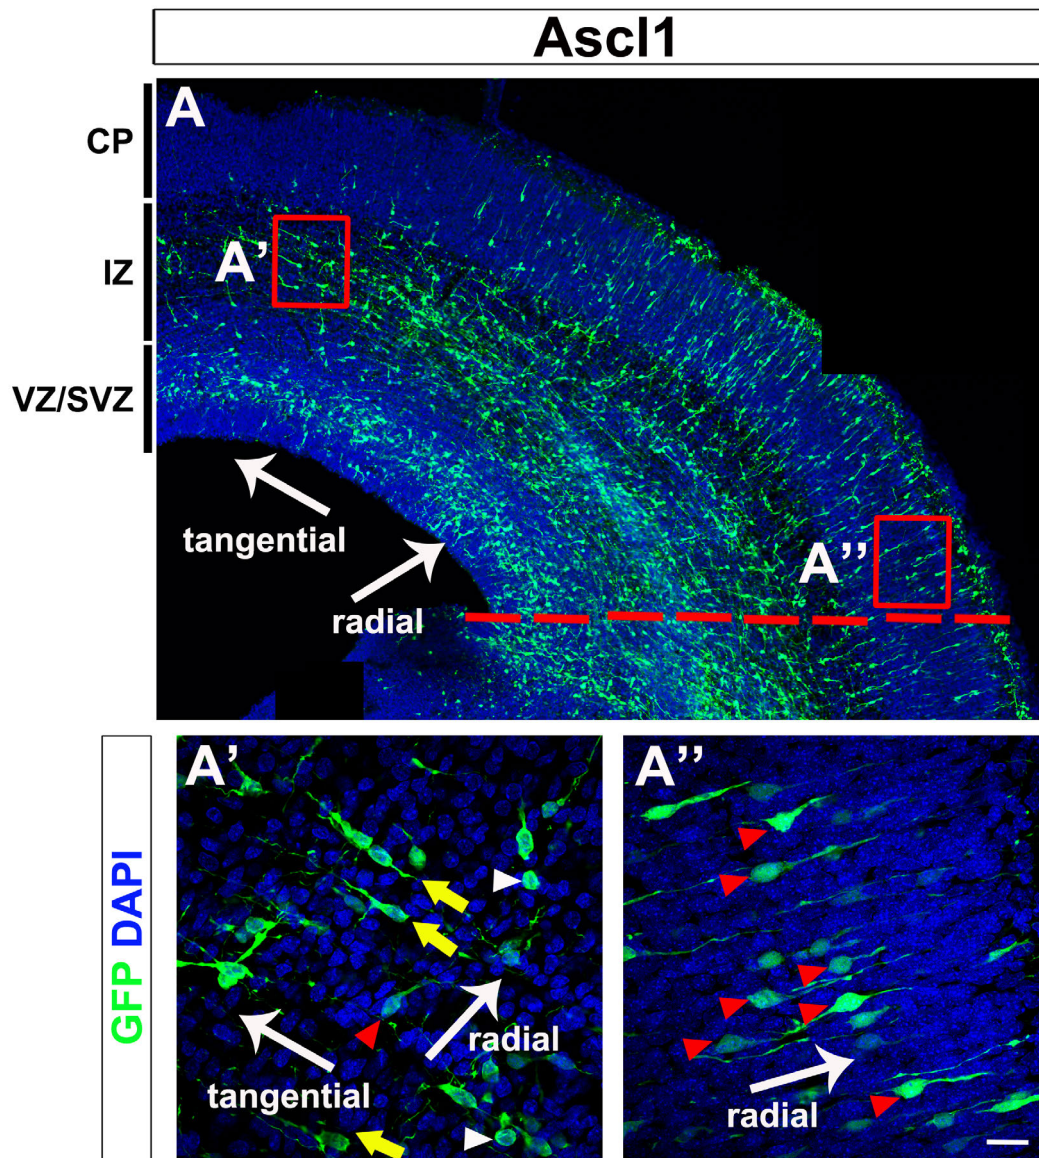

**Figure S2. Categorization of GFP-positive cells based on the orientation of their leading processes.** Four days after electroporation of *Ascl1* and *GFP* expression constructs, brains of E19.5 rats were dissected and sectioned in the coronal plane. Electroporated cells were labeled with anti-GFP in green; nuclear DNA was stained with DAPI in blue. (A) Zoomed areas for the IZ (A') and the CP (A'') were indicated by red squares. GFP-positive cells with leading processes horizontal to the boundary of the lateral ventricle were categorized as tangentially migrating cells (yellow arrows). GFP-positive cells with leading processes vertical to the boundary of the lateral ventricle were categorized as radially migrating cells (red arrowheads). GFP-positive cells without leading processes or the orientation of their leading processes were not clear were categorized as other cells (white arrowheads). (A') GFP-positive cells in the IZ were tangentially migrating cells, radially migrating cells, and other cells. (A'') Most GFP-positive cells in the CP were radially migrating cells. The length of scale bar is 20  $\mu\text{m}$  in (A') and (A'').

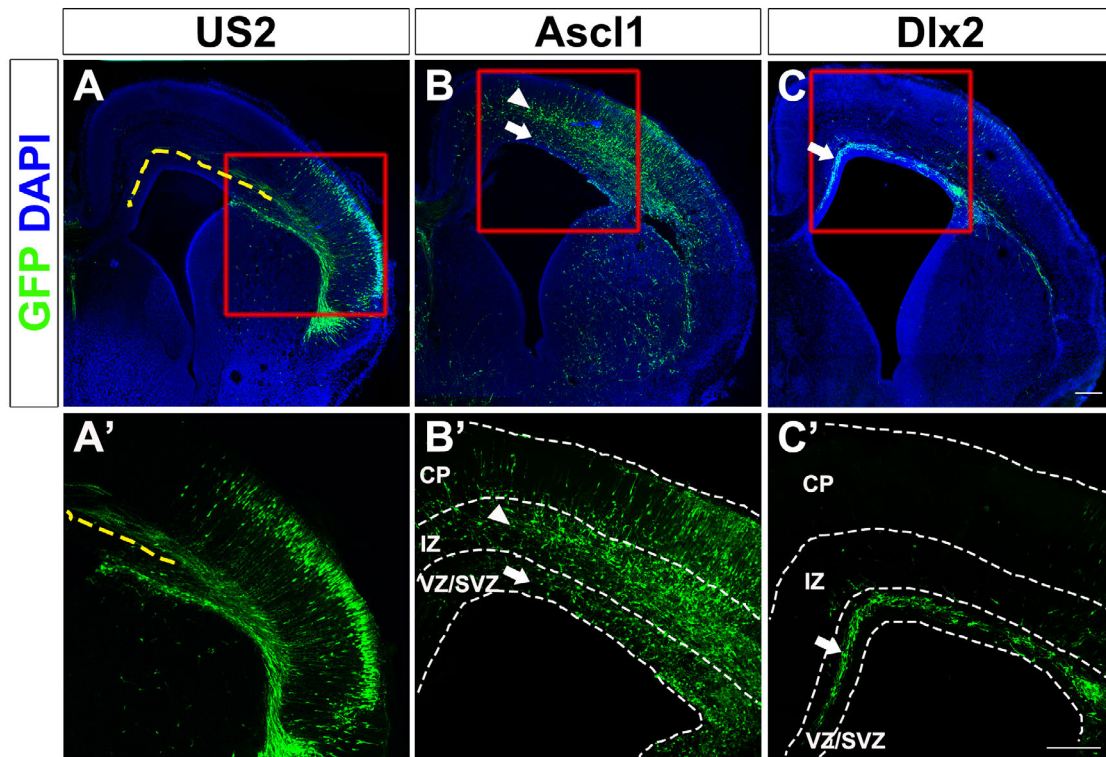

**Figure S3. Overexpression of *Ascl1* and *Dlx2* in the dorsal telencephalon induces ectopically tangential migration in mice.** Four days after electroporation, brains of E18.5 mice were dissected and sectioned in the coronal plane. Electroporated cells were labeled with anti-GFP in green; nuclear DNA was stained with DAPI in blue. (A'-C') are zoomed regions of (A-C) indicated by red squares. (A) In the control group. GFP-positive cells were distributed near or above the electroporated area and many of them extended processes radially. GFP-positive axons extending to the contralateral side were labeled by yellow dashed line. (B) In *Ascl1* group, many GFP-positive cells were distributed in the VZ/SVZ (white arrows) and IZ (white arrowheads) dorsomedial to the electroporated site. (C) In *Dlx2* group, many GFP-positive cells were distributed in the VZ/SVZ (white arrows) dorsomedial to the electroporated site. The length of scale bar is 100  $\mu$ m.

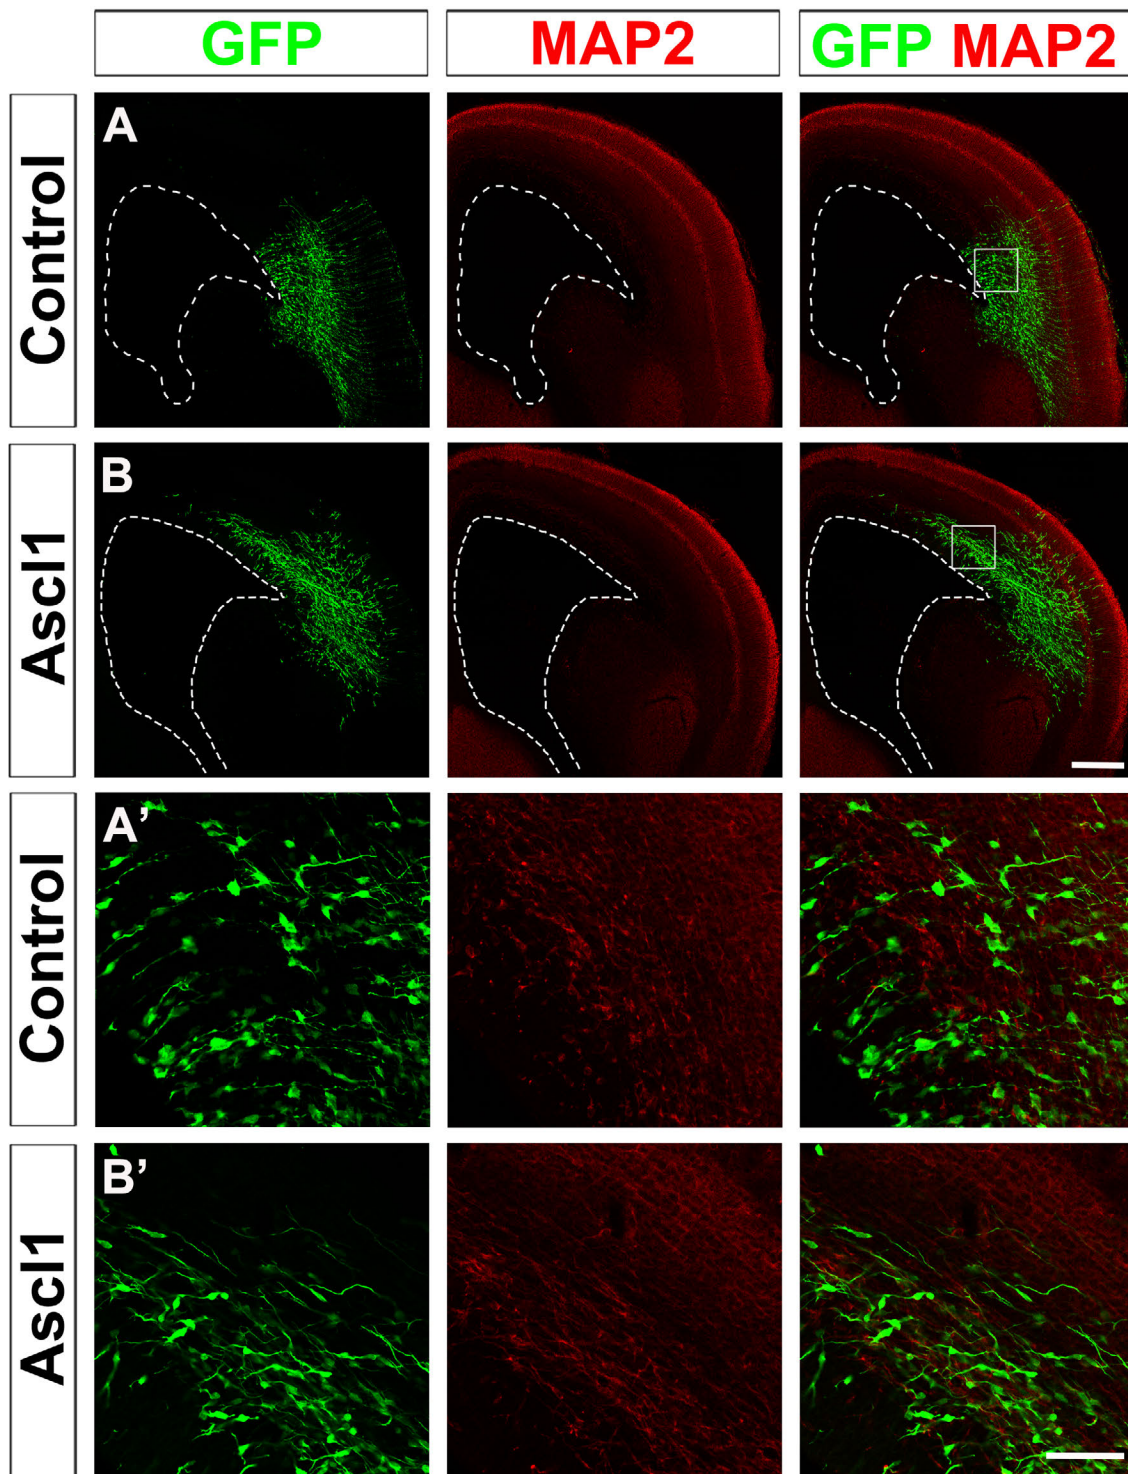

**Figure S4. Overexpression of *Ascl1* in the dorsal telencephalon does not promote premature neuronal differentiation.** Two days after electroporation, brains of E17.5 rats were dissected and sectioned in the coronal plane. Electroporated cells were labeled with anti-GFP in green. Differentiated neurons in the CP were labeled with anti-MAP2 in red. (A, B) Confocal images of tissue sections; a white square indicates the area for (A', B'). (A', B') In both the control and *Ascl1* groups, no MAP2 and GFP-double positive cells were detected in the IZ and VZ/SVZ of the dorsal telencephalon. Length of the scale bar is 120  $\mu\text{m}$  in (A-B), and 50  $\mu\text{m}$  in (A'-B').

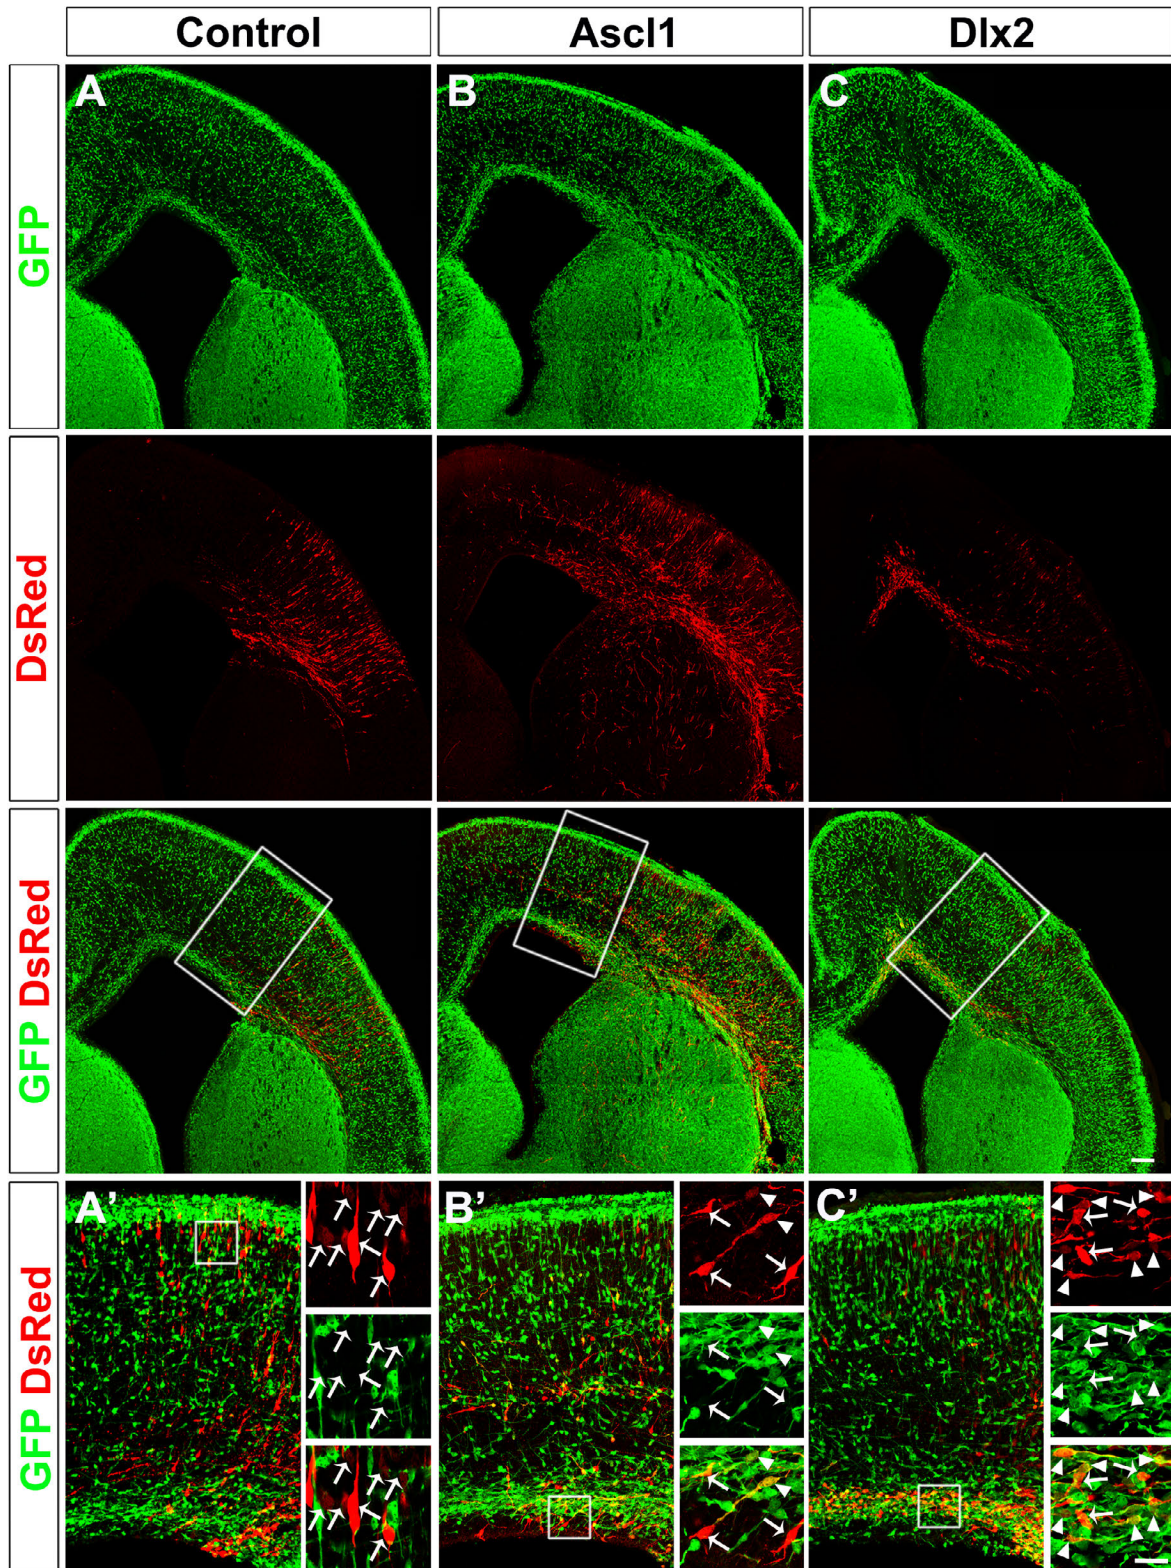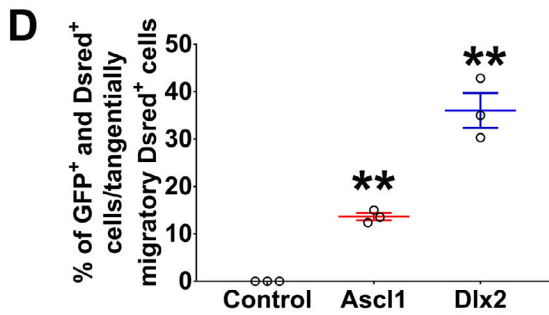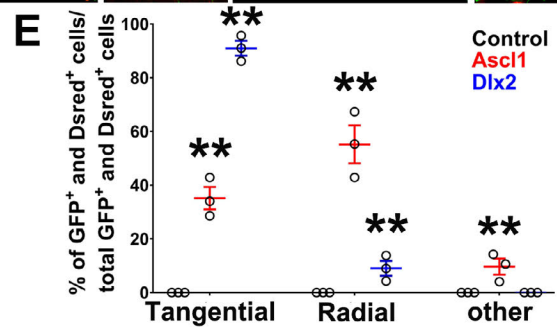

**Figure S5. Overexpression of *Ascl1* and *Dlx2* in the dorsal telencephalon induces ectopic GABAergic interneurons in *Gad67-GFP* mice.** Four days after electroporation, brains of E18.5 *Gad67-GFP* mice were dissected and sectioned in the coronal plane. Electroporated cells were labeled with anti-DsRed; nuclear DNA was stained with DAPI in blue. (A'-C') were zoomed regions of (A-C) indicated by white squares. (A-A') In the control group, most DsRed-positive cells extend radial processes. None of the DsRed-positive cells were *Gad67-GFP*-positive (white arrows). (B) In *Ascl1* group, many DsRed-positive cells were distributed in the VZ/SVZ and IZ dorsomedial to the electroporated site. (C) In *Dlx2* group, many DsRed-positive cells were distributed in the VZ/SVZ dorsomedial to the electroporated site. (B', C') Some DsRed-positive cells were *Gad67-GFP*-positive (white arrowheads); some DsRed-positive cells were *Gad67-GFP*-negative (white arrows). The length of scale bar is 100  $\mu\text{m}$ . (D) Quantification of *Gad67-GFP* and Dsred double-positive cells over total DsRed-positive cells in the dorsal telencephalon. Data are presented as mean $\pm$ SEM with all data points. Student's t-test, n=3. \*: p<0.05; \*\*: p<0.01. (E) *Gad67-GFP* and Dsred double-positive cells were categorized into radial, tangential, or other types according to the orientation of their leading processes. Data are presented as mean $\pm$ SEM with all data points. Student's t-test, n=3. \*: p<0.05; \*\*: p<0.01.

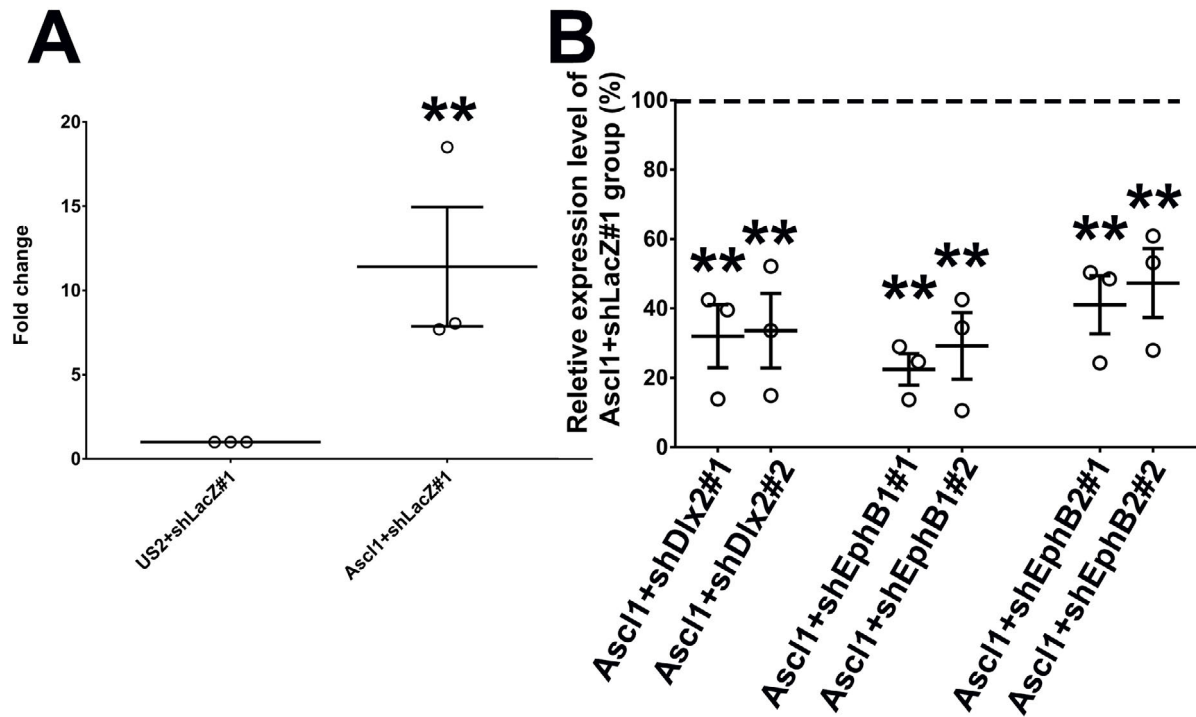

**Figure S6. Efficient knockdown of *Dlx2*, *Ephb1*, and *Ephb2* in *Ascl1*-expressing P19 cells.** Total RNA of P19 cells was extracted two days after transfection for quantitative RT-PCR. (A) P19 cells were transfected with control (*US2*) or *Ascl1* expression construct. shLacZ#1 was used as a control shRNA expression construct. The level of *Dlx2* mRNA was increased in the *Ascl1*-expressing P19 cells comparing with that in the control group. (B) P19 cells were transfected with *Ascl1* and shLacZ, shDlx2, shEphB1 or shEphB2. We used two shRNA expression constructs to target each gene (#1 and #2). The mRNA level of *Dlx2*, *Ephb1*, or *Ephb2* in *Ascl1*+shLacZ#1 group was used for normalization (100%, indicated by black dash line). Expression of *Dlx2*, *Ephb1*, or *Ephb2* was decreased upon transfection of shDlx2, shEphB1 or shEphB2 vectors, respectively. Data are presented as mean $\pm$ SEM with all data points and analyzed by using Student's test, n=3; \*\*: p<0.01.

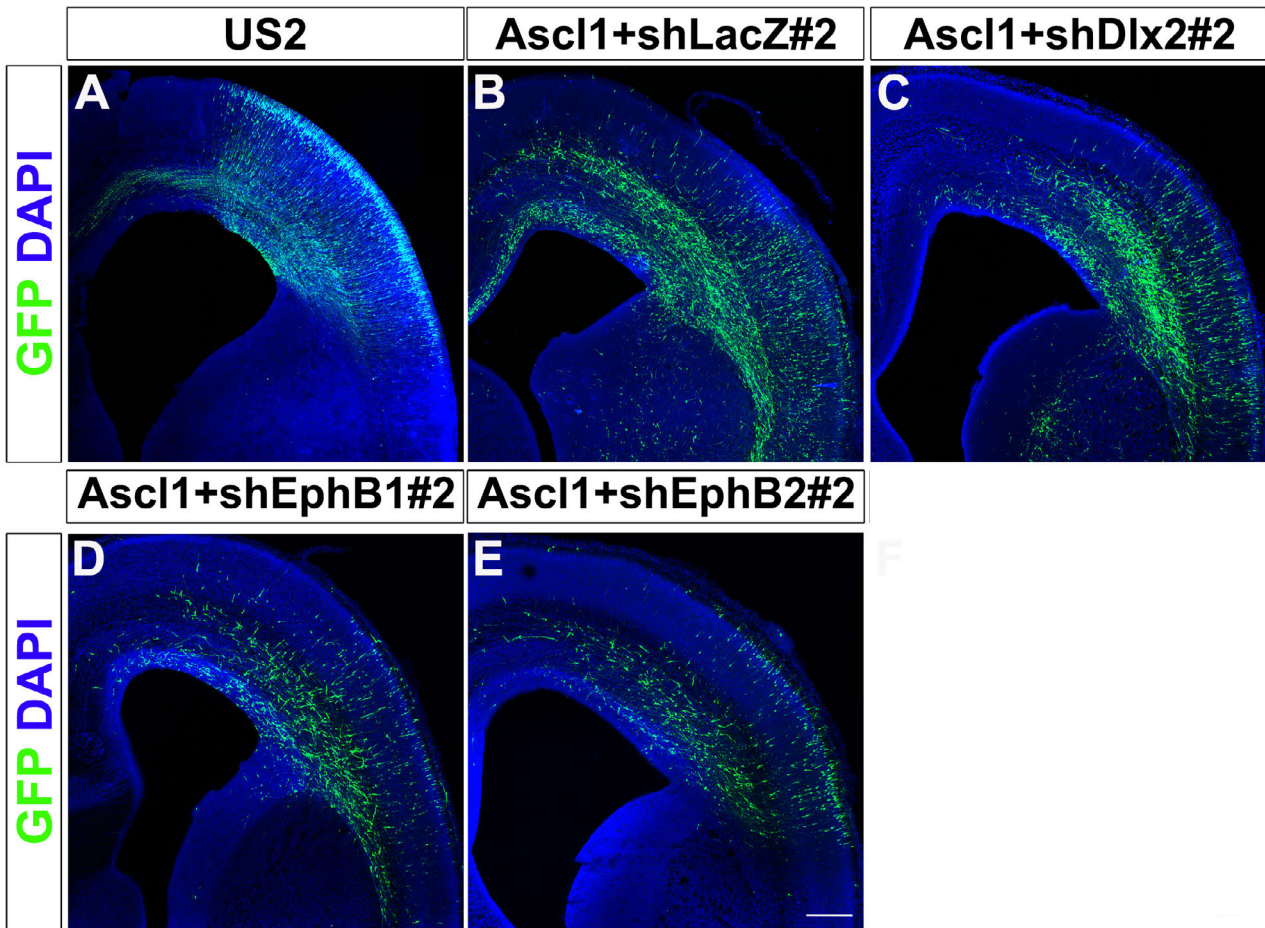

**Figure S7. Knockdown of *Dlx2*, *Ephb1*, or *Ephb2* disrupts tangential migration promoted by *Ascl1*.** Four days after electroporation to the dorsal telencephalon, brains of E19.5 rats were dissected and sectioned in the coronal plane. Electroporated cells were labeled with anti-GFP in green; nuclear DNA was stained with DAPI in blue. Additional shRNA expression constructs were used to knock down *LacZ*, *Dlx2*, *Ephb1*, and *Ephb2* in the dorsal telencephalon. Similar to shDlx2#1, EphB1#1, or EphB2#1 in Fig. 2 and 4, electroporation of shDlx2#2, EphB1#2, or EphB2#2 affected distribution of GFP-positive cells. Length of the scale bar is 120  $\mu$ m. US2 control group: n=6. All other groups: n=3.

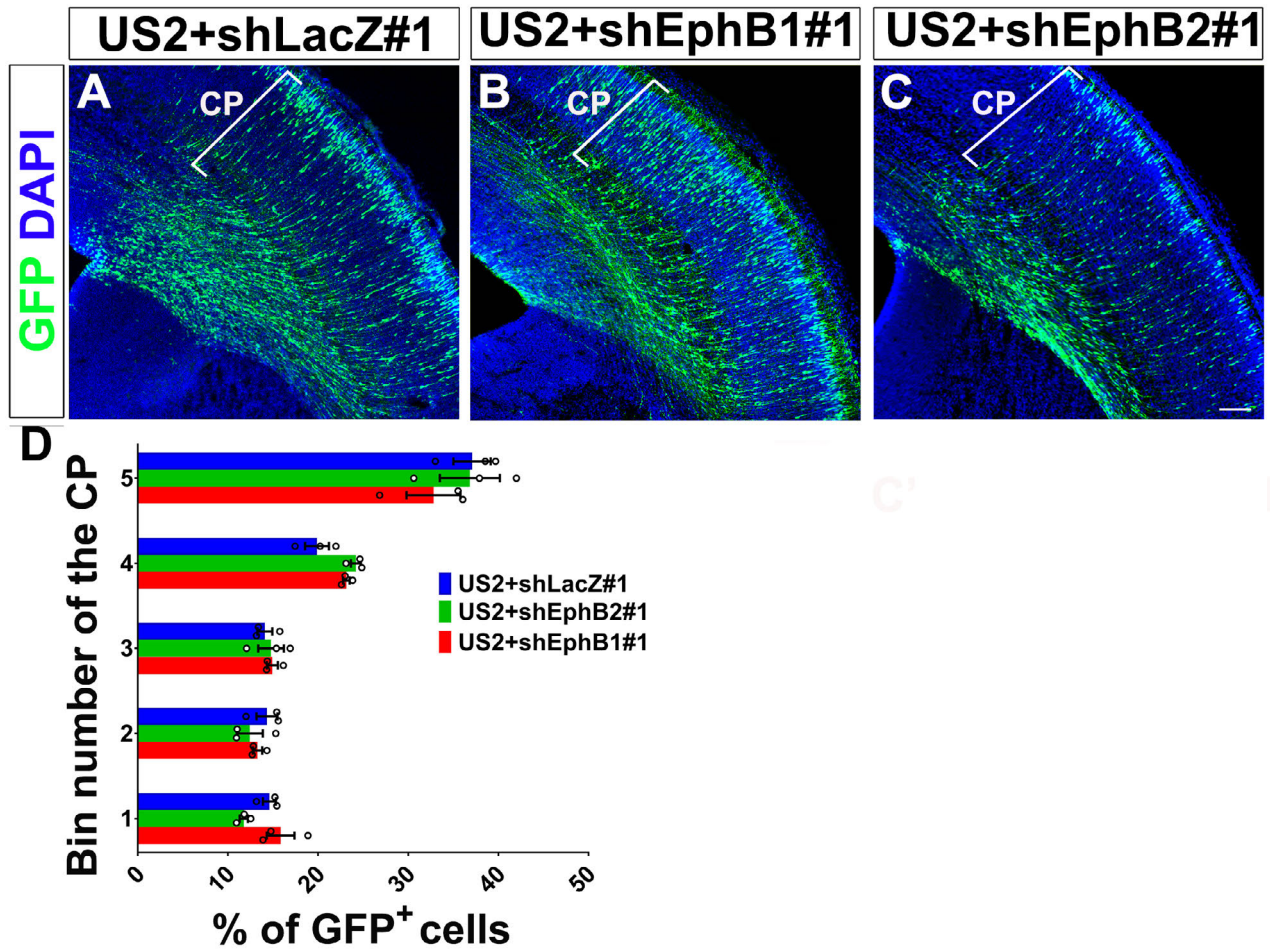

**Figure S8. Knockdown of *Ephb1* or *Ephb2* does not attenuate radial migration.** Four days after electroporation to the dorsal telencephalon, brains of E19.5 rats were dissected and sectioned in the coronal plane. Electroporated cells were labeled with anti-GFP in green; nuclear DNA was stained with DAPI in blue. No *Ascl1* expression vector was transfected. US2 and shLacZ#1 vectors were used as controls. (A-C) The distributions of GFP-positive cells in the CP were similar among US2+shLacZ#1, US2+shEphB1#1, and US2+shEphB2#1. Length of the scale bar is 100  $\mu$ m. (D) The CP was divided equally into 5 bins and GFP-positive cells in each bin were counted. The distributions of GFP-positive cells in the CP were similar among three groups. Data are presented as mean $\pm$ SEM with all data points and analyzed by using Student's test, n=3.



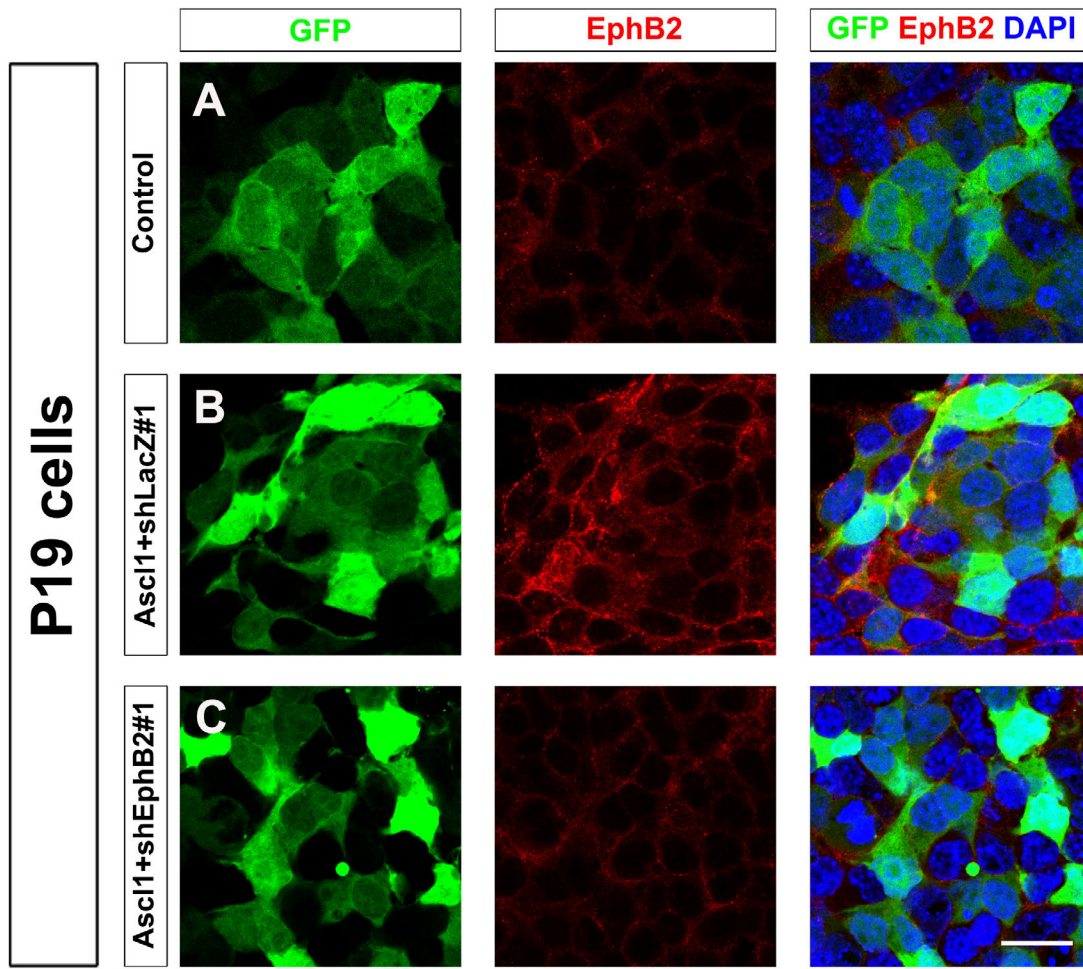

**Figure S9. Overexpression of *Ascl1* increases the level of EphB2 in P19 cells.** P19 cells were transfected with expression constructs and fixed for immunofluorescence two days after transfection. A GFP expression construct was co-transfected to indicate transfected cells. Cells were labeled with anti-EphB2 in red. Nuclear DNA was stained with DAPI in blue. (A) A low level of EphB2 was detected in P19 cells. (B) Expression of *Ascl1* increased the immunofluorescent staining signal of EphB2. (C) Knockdown of *Ephb2* substantially decreased the immunofluorescent staining signal of EphB2 in *Ascl1*-expressing cells. The length of scale bar is 20  $\mu$ m.

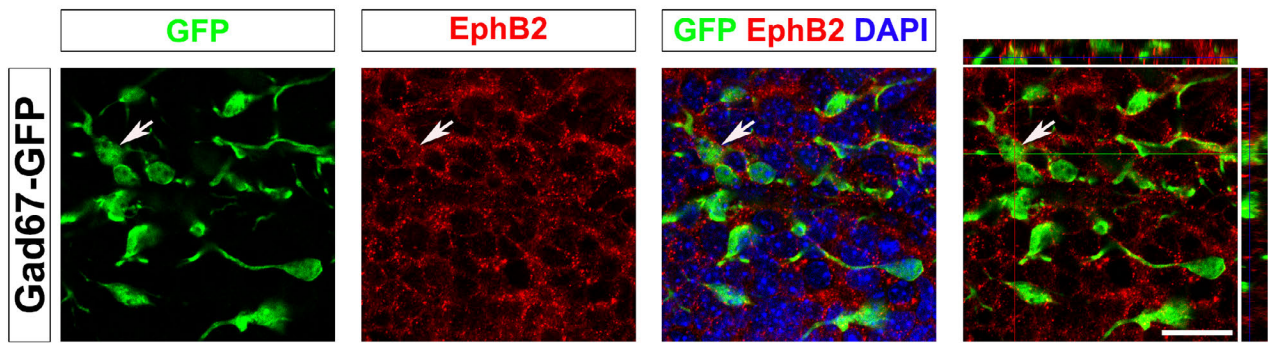

**Figure S10. EphB2 is detected in cortical interneurons.** Brains of E18.5 *Gad67-GFP* mice were dissected and sectioned in the coronal plane. The brain sections were labeled with anti-GFP in green and anti-EphB2 in red. Nuclear DNA was stained with DAPI in blue. The confocal image was taken from the VZ/SVZ region of dorsal telencephalon. A stacked image shows that a GFP-positive cell is also EphB2-positive (indicated by arrows). Length of the scale bar is 20  $\mu\text{m}$ .

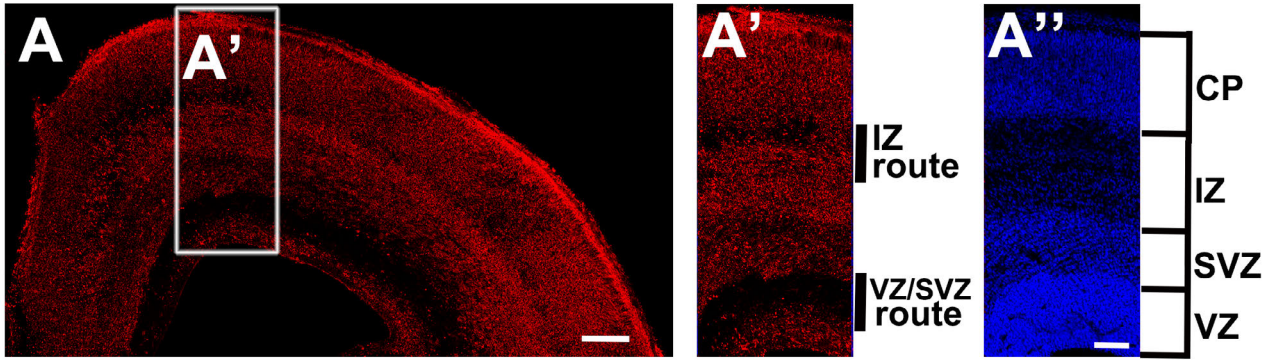

**Figure S11. Ephrin-A5 is detected in the dorsal telencephalon.** E19.5 rat brains were dissected and sectioned in the coronal plane. Anti-Ephrin-A5 signal was labeled in red; nuclear DNA was stained with DAPI in blue. A white square indicates the zoom-in areas for A' and A''. The IZ and VZ/SVZ migratory routes are indicated in A'; the CP, IZ, SVZ and VZ are indicated in A''. Four stripes are positive for Ephrin-A5: deep VZ, upper SVZ, deep IZ and CP. Length of the scale bar is 100  $\mu\text{m}$  in (A), and 120  $\mu\text{m}$  in (A') and (A'').

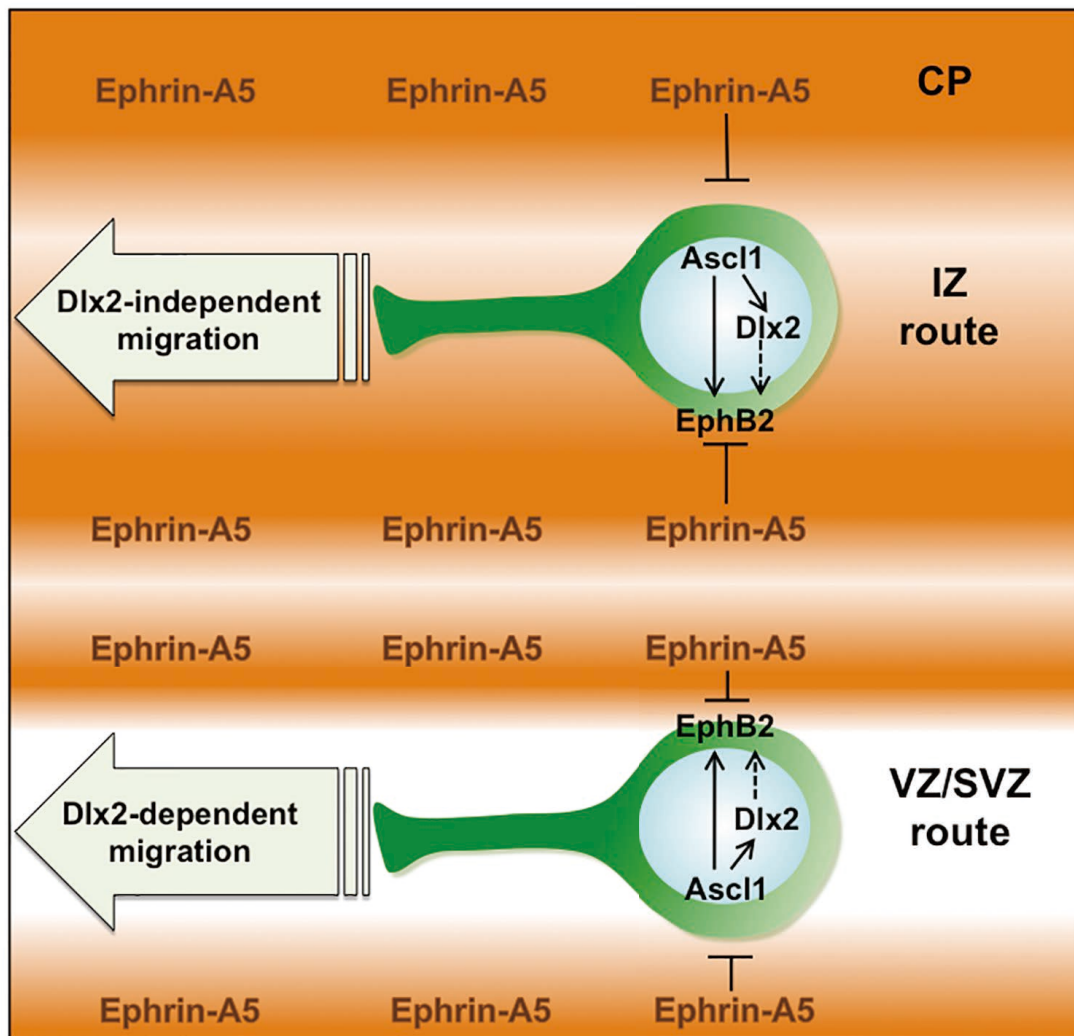

**Figure S12.** A schematic model for the role of *Ascl1* in the tangential migration of cortical interneurons. *Ascl1* promotes tangential migration through the VZ/SVZ route in a *Dlx2*-dependent manner, while promoting tangential migration through the IZ route in a *Dlx2*-independent manner. *Ascl1* induces *Ephb2* expression to confine these two migratory routes through EphB2-Ephrin-A5 signaling.

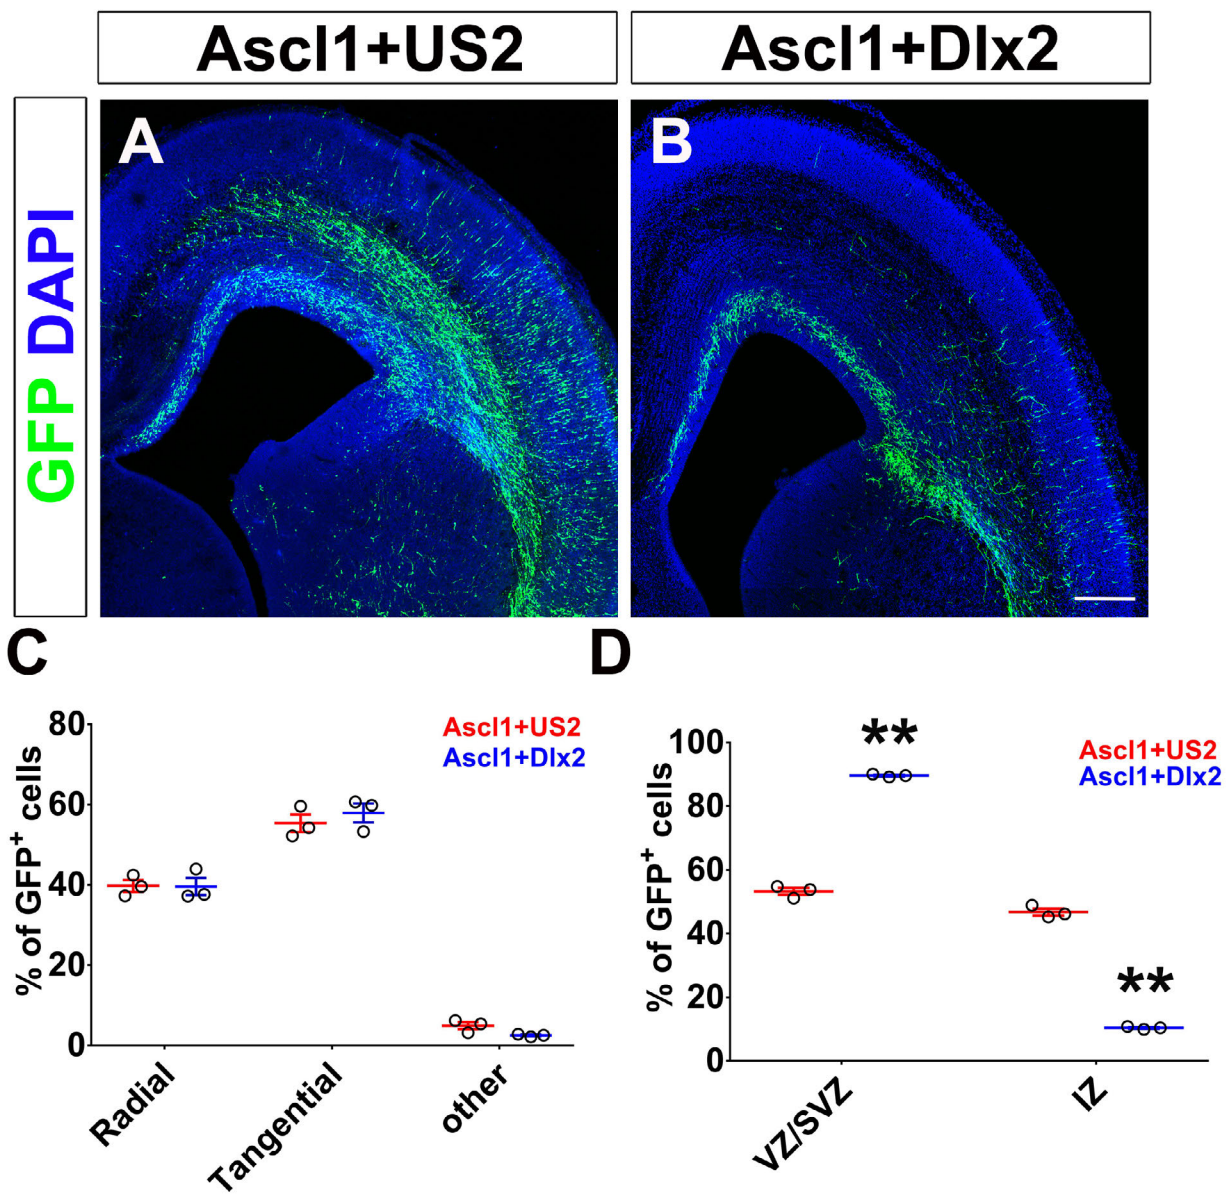

**Figure S13. Simultaneous expression of *Ascl1* and *Dlx2* promotes tangential migration through the VZ/SVZ route.** Four days after electroporation to the dorsal telencephalon, brains of E19.5 rats were dissected, fixed, and sectioned in the coronal plane. Electroporated cells were labeled with anti-GFP in green; nuclear DNA was stained with DAPI in blue. US2 vector was used as a control. (A) In *Ascl1*+US2 group, many GFP-positive cells were distributed in the VZ/SVZ and IZ dorsomedial to the electroporated site. (B) In *Ascl1*+*Dlx2* group, many GFP-positive cells were distributed in the VZ/SVZ dorsomedial to the electroporated site. Length of the scale bar is 120  $\mu$ m. (C) Migrating cells were categorized according to the orientation of their leading processes. (D) Quantification of GFP-positive cells in the VZ/SVZ and IZ. Data are presented as mean $\pm$ SEM with all data points and analyzed by using Student's test, n=3. \*: p<0.05; \*\*: p<0.01.

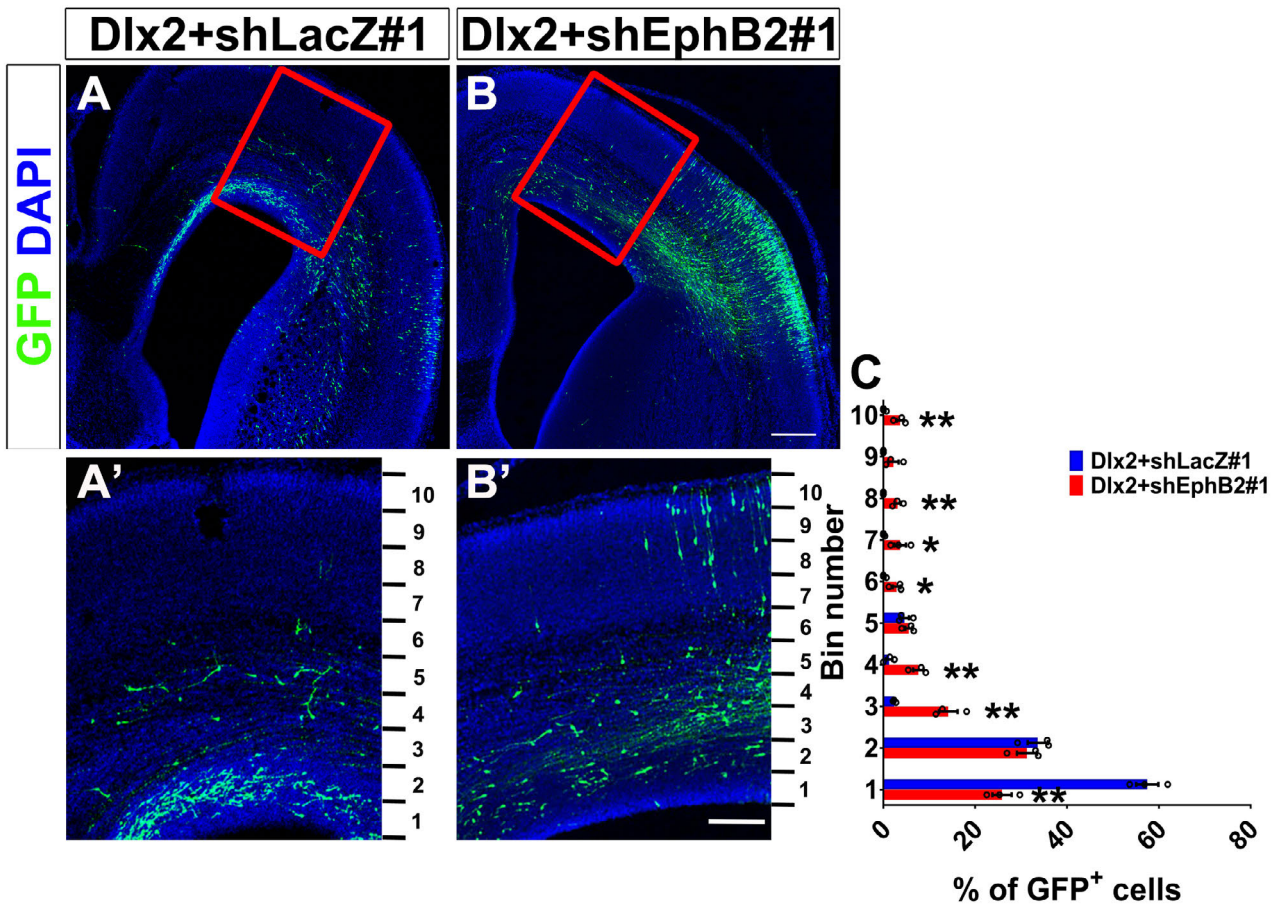

**Figure S14. Knockdown of *Ephb2* disrupts tangential migration promoted by *Dlx2*.** Four days after electroporation to the dorsal telencephalon, brains of E19.5 rats were dissected and sectioned in the coronal plane. Electroporated cells were labeled with anti-GFP in green; nuclear DNA was stained with DAPI in blue. (A'-B') are zoomed regions of (A-B) indicated by red squares. The cortex was divided equally into 10 bins. (A, A') In *Dlx2+shLacZ#1* group, many GFP-positive cells were distributed in the VZ/SVZ (bins 1 and 2). (B, B') In *Dlx2+shEphB2#1* group, GFP-positive cells distributed in the VZ/SVZ (bins 1 and 2) were reduced. Length of the scale bar is 120  $\mu\text{m}$  in (A, B) and 100  $\mu\text{m}$  in (A', B'). (C) Distribution of GFP-positive cells in the dorsal telencephalon. Data are presented as mean $\pm$ SEM with all data points and analyzed by using one-way ANOVA with Tukey's-HSD post hoc test, n=3. \*: p<0.05; \*\*: p<0.01.

**Video S1. GFP-positive cells migrate radially in US2 (Control) group.** A yellow arrowhead indicates a radially migrating cell.

**Video S2. GFP-positive cells migrate tangentially or radially in Ascl1 group.** A red arrow indicates a tangentially migrating cell and a yellow arrowhead indicates a radially migrating cell.
